# Supplementary material for: Interbacterial Transfer of Carbapenem Resistance and Large Antibiotic Resistance Islands by Natural Transformation in Pathogenic Acinetobacter
Source: PubMed Central journal article supplement (PMC8787482; doi:10.1128/mbio.02631-21), 2022-01-25
Supplement: mbio.02631-21-st001.pdf [file mbio.02631-21-st001.pdf]

**Table S1: Bacterial strains, plasmids and primers used in this study.**

| Strain                                           | Description/phenotype                                                                                                                                | Reference       |
|--------------------------------------------------|------------------------------------------------------------------------------------------------------------------------------------------------------|-----------------|
| Recipient strains for natural transformation     |                                                                                                                                                      |                 |
| M2                                               | <i>A. nosocomialis</i> strain M2 wild-type                                                                                                           | (1)             |
| M2 Rif <sup>R</sup>                              | Spontaneous <i>rpoB</i> mutant; rifampicin resistant                                                                                                 | This study      |
| M2 Rif <sup>R</sup> $\Delta$ <i>comEC::aacC4</i> | Insertion of an apramycin resistance cassette in the <i>comEC</i> gene of the M2 Rif <sup>R</sup> strain; Non transformable and rifampicin resistant | This study      |
| M2 Rif <sup>R</sup> $\Delta$ <i>recA::aacC4</i>  | Insertion of an apramycin resistance cassette in the <i>recA</i> gene of the M2 Rif <sup>R</sup> strain; Non transformable and rifampicin resistant  | This study      |
| M2 Rif <sup>R</sup> $\Delta$ <i>pilA::kan</i>    | Insertion of a kanamycin resistance cassette in the <i>pilA</i> gene of the M2 Rif <sup>R</sup> strain; Non transformable and rifampicin resistant   | This study      |
| AYE                                              | <i>A. baumannii</i> strain AYE wild-type                                                                                                             | (2)             |
| AYE Rif <sup>R</sup>                             | Spontaneous <i>rpoB</i> mutant; rifampicin resistant                                                                                                 | This study      |
| 29D2                                             | <i>A. baumannii</i> nonclinical isolate 29D2 wild-type                                                                                               | (3)             |
| 29D2 Rif <sup>R</sup>                            | Spontaneous <i>rpoB</i> mutant; rifampicin resistant                                                                                                 | This study      |
| A118                                             | <i>A. baumannii</i> strain A118 wild-type                                                                                                            | (4)             |
| A118 Rif <sup>R</sup>                            | Spontaneous <i>rpoB</i> mutant; rifampicin resistant                                                                                                 | This study      |
| 27304                                            | <i>A. baumannii</i> veterinary clinical isolate 27304                                                                                                | Resapath, ANSES |
| 27304 Rif <sup>R</sup>                           | Spontaneous <i>rpoB</i> mutant; rifampicin resistant                                                                                                 | This study      |
| 27024                                            | <i>A. baumannii</i> veterinary clinical isolate 27024                                                                                                | Resapath, ANSES |
| 27024 Rif <sup>R</sup>                           | Spontaneous <i>rpoB</i> mutant; rifampicin resistant                                                                                                 | This study      |

| Donor strains for natural transformation              |                                                                                                     |                                                     |                                                                             |
|-------------------------------------------------------|-----------------------------------------------------------------------------------------------------|-----------------------------------------------------|-----------------------------------------------------------------------------|
| 40288                                                 | <i>A. baumannii</i> veterinary clinical isolate 40288; carbapenem resistant                         |                                                     | (5)                                                                         |
| 40288 $\Delta comEC::aacC4$                           | Insertion of an apramycin resistance cassette in the <i>comEC</i> gene; Not naturally transformable |                                                     | This study                                                                  |
| AB5075                                                | <i>A. baumannii</i> strain AB5075 wild-type; carbapenem resistant                                   |                                                     | (6)                                                                         |
| 37986                                                 | <i>A. baumannii</i> veterinary clinical isolate 37986; carbapenem resistant                         |                                                     | (5)                                                                         |
| CNRAB1                                                | <i>A. baumannii</i> human clinical isolate CNRAB1; carbapenem resistant                             |                                                     | Centre National de Référence de l'antibiorésistance de Besançon, France.    |
| M2 $\Delta comEC::aacC4$                              | Insertion of an apramycin resistance cassette in the <i>comEC</i> gene; Not naturally transformable |                                                     | This study                                                                  |
| AYE $\Delta comEC::aacC4$                             | Insertion of an apramycin resistance cassette in the <i>comEC</i> gene; Not naturally transformable |                                                     | This study                                                                  |
| AB5075 $\Delta comEC::aacC4$                          | Insertion of an apramycin resistance cassette in the <i>comEC</i> gene; Not naturally transformable |                                                     | This study                                                                  |
|                                                       |                                                                                                     |                                                     |                                                                             |
| Genetic construct                                     | Name                                                                                                | Primer Sequence 5' to 3'                            | Template; Annealing site                                                    |
| Chromosomal modifications using overlap extension PCR |                                                                                                     |                                                     |                                                                             |
| <i>comEC::aacC4</i>                                   | comEC_UP_F                                                                                          | TGGTGTGCTGCTACTAATTACGGT                            | <i>Acinetobacter</i> genomic DNA; 2kb upstream of the <i>comEC</i> gene     |
|                                                       | comEC_apra_R                                                                                        | GTGCCGTGCTAGTAGCACGCCCTCCCGTTCAGAGCCTCGCCCACTTTTTC  | <i>Acinetobacter</i> genomic DNA; Chimeric, middle of the <i>comEC</i> gene |
|                                                       | comEC_apra_F                                                                                        | GGCGAGCGGTCAGCTAACCGACTCGAGTACTGGATAGGCTCTGGTTGAGTA | <i>Acinetobacter</i> genomic DNA; Chimeric, middle of the <i>comEC</i> gene |
|                                                       | Apr_Fw                                                                                              | CAGGCTGGGTGCCAAGCTCT                                | pMHL-2 (Godeux et al., 2018) ; downstream <i>aacC4</i> gene                 |
|                                                       | Apr_Rev                                                                                             | TCATGAGCTCAGCCAATCGACTGG                            | pMHL-2 (Godeux et al., 2018) ; upstream                                     |

|                                                           |                    |                                                            |                                                                                                           |
|-----------------------------------------------------------|--------------------|------------------------------------------------------------|-----------------------------------------------------------------------------------------------------------|
|                                                           |                    |                                                            | <i>aacC4</i> gene                                                                                         |
|                                                           | comEC_DW_R         | CTTCAGTTCACGCATCAAGCTTGT                                   | <i>Acinetobacter</i> genomic DNA; 2kb upstream of the <i>comEC</i> gene                                   |
| <i>pilA::kan</i>                                          | asg-145            | GTTATGGCGGCGGTGGAGGTC                                      | <i>Acinetobacter</i> genomic DNA ; 1kb upstream of the <i>pilA</i> gene                                   |
|                                                           | asg-143            | GAACACTTGAGGCGCAGAGTAAATGCTTCAGATGC                        | <i>Acinetobacter</i> genomic DNA ; Chimeric, middle of the <i>pilA</i> gene                               |
|                                                           | asg-144            | CCTTCTTCACGAGGCATCAATCATTGTAGCATCG                         | <i>Acinetobacter</i> genomic DNA ; Chimeric, middle of the <i>pilA</i> gene                               |
|                                                           | kan-F              | CTGCGCCTCAAGTGTTTC                                         | KanR gene cassette ; upstream the <i>kanR</i> gene                                                        |
|                                                           | kan-R              | TGCCTCGTGAAGAAGG                                           | KanR gene cassette ; downstream the <i>kanR</i> gene                                                      |
|                                                           | asg-146            | AGAATACTTGCATAGTGACAGGTTACAG                               | <i>Acinetobacter</i> genomic DNA ; 1kb downstream of the <i>pilA</i> gene                                 |
| <i>recA::aacC4</i>                                        | LH114_V2_recA      | CTTTTTATTGCTCTCAAGATGAAC                                   | <i>Acinetobacter</i> genomic DNA; 2kb upstream of the <i>recA</i> gene                                    |
|                                                           | LH115_V2_recA      | GGAACTTCGAAGCAGCTCCAGCCTACACAATCGTAATGCTTTGCTTTTATTCTCATCC | <i>Acinetobacter</i> genomic DNA; Chimeric: 5' of the <i>recA</i> gene and upstream of <i>aac4</i> gene   |
|                                                           | LH116_recA_AB 5075 | AACTAAGGAGGATATTCATATGGACCATGGCGACTACAGGCACAAATGGTGC       | <i>Acinetobacter</i> genomic DNA; Chimeric: downstream of <i>aac4</i> gene and 3' of the <i>recA</i> gene |
|                                                           | LH117_recA_AB 5075 | GTTGGTACAATGCTCGAGGTG                                      | <i>Acinetobacter</i> genomic DNA; 2kb downstream of the <i>recA</i> gene                                  |
| Primers for control of the transformants using colony PCR |                    |                                                            |                                                                                                           |
|                                                           | comM-For           | CCACAATGGAACAAGAAGATGTCT                                   | M2 genomic DNA; 5' of the <i>comM</i> gene                                                                |
|                                                           | comM-Rev           | TTAAGAGTGATTACCTCGATAAGA                                   | M2 genomic DNA; 3' of the <i>comM</i> gene                                                                |

|  |           |                          |                                   |
|--|-----------|--------------------------|-----------------------------------|
|  | OXA23-For | GATCGGATTGGAGAACCAGA     | <i>bla</i> <sub>OXA-23</sub> gene |
|  | OXA23-Rev | ATTTCTGACCGCATTTCAT      | <i>bla</i> <sub>OXA-23</sub> gene |
|  | mlo-80    | CGGATCTTCGATGCTGGC       | AbaR1 from AYE strain             |
|  | mlo-84    | GCAACGATGTTACGCAGC       | AbaR1 from AYE strain             |
|  | 5'-J-Rev  | ATGGAATGTAGTACTCTGACG    | AbaR1 from AYE; AbaR junction     |
|  | 3'-J-For  | GATTCACATCATATTCATTGCCCC | AbaR1 from AYE; AbaR junction     |

1. Niu C, Clemmer KM, Bonomo RA, Rather PN. 2008. Isolation and Characterization of an Autoinducer Synthase from *Acinetobacter baumannii*. J Bacteriol 190:3386–3392.
2. Fournier P-E, Vallenet D, Barbe V, Audic S, Ogata H, Poirel L, Richet H, Robert C, Mangenot S, Abergel C, Nordmann P, Weissenbach J, Raoult D, Claverie J-M. 2006. Comparative genomics of multidrug resistance in *Acinetobacter baumannii*. PLoS genetics 2:e7.
3. Wilharm G, Skiebe E, Higgins PG, Poppel MT, Blaschke U, Leser S, Heider C, Heindorf M, Brauner P, Jäckel U, Böhländ K, Cuny C, Łopińska A, Kaminski P, Kasprzak M, Bochenski M, Ciebiera O, Tobółka M, Żołnierowicz KM, Siekiera J, Seifert H, Gagné S, Salcedo SP, Kaatz M, Layer F, Bender JK, Fuchs S, Semmler T, Pfeifer Y, Jerzak L. Relatedness of wildlife and livestock avian isolates of the nosocomial pathogen *Acinetobacter baumannii* to lineages spread in hospitals worldwide. Environ Microbiol 19:4349–4364.
4. Ramirez MS, Don M, Merkier AK, Bistué AJS, Zorreguieta A, Centrón D, Tolmasky ME. 2010. Naturally Competent *Acinetobacter baumannii* Clinical Isolate as a Convenient Model for Genetic Studies. J Clin Microbiol 48:1488–1490.
5. Lupo A, Châtre P, Ponsin C, Saras E, Jean-Boulouis H, Keck N, Haenni M, Madec J-Y. 2016. Clonal Spread of *bla* OXA-23 ST25 *Acinetobacter baumannii* in Companion Animals in France. Antimicrobial Agents and Chemotherapy AAC.01881-16.
6. Jacobs AC, Thompson MG, Black CC, Kessler JL, Clark LP, McQueary CN, Gancz HY, Corey BW, Moon JK, Si Y, Owen MT, Hallock JD, Kwak YI, Summers A, Li CZ, Rasko DA, Penwell WF, Honnold CL, Wise MC, Waterman PE, Lesho EP, Stewart RL, Actis LA, Palys TJ, Craft DW, Zurawski DV. 2014. AB5075, a Highly Virulent Isolate of *Acinetobacter baumannii*, as a Model Strain for the Evaluation of Pathogenesis and Antimicrobial Treatments. mBio 5:e01076-14.
