# Supplementary material for: Interbacterial Transfer of Carbapenem Resistance and Large Antibiotic Resistance Islands by Natural Transformation in Pathogenic Acinetobacter
Source: PubMed Central journal article supplement (PMC8787482; doi:10.1128/mbio.02631-21), 2022-01-25
Supplement: mbio.02631-21-st002.pdf [file mbio.02631-21-st002.pdf]

| Minimum inhibitory concentration (E-test) <sup>a</sup> |          |       |                     |                    |                                          |
|--------------------------------------------------------|----------|-------|---------------------|--------------------|------------------------------------------|
| Antibiotic                                             | 40288 WT | M2 WT | M2 Rif <sup>R</sup> | <i>comM::AbaR4</i> | M2 Rif <sup>R</sup> <i>vgrG3::Tn2006</i> |
| IMP                                                    | >32      | 0.25  |                     | >32                | >32                                      |

| Inhibition zone diameter in mm <sup>b</sup> |        |       |                     |                                        |         |
|---------------------------------------------|--------|-------|---------------------|----------------------------------------|---------|
| Antibiotic                                  | AYE WT | M2 WT | M2 Rif <sup>R</sup> | M2 Rif <sup>R</sup> <i>comM::AbaR1</i> |         |
|                                             |        |       |                     | Clone 1                                | Clone 2 |
| AMK                                         | 8      | 29    | 28                  | 15                                     | 14      |
| GEN                                         | 6      | 29    | 28                  | 12                                     | 12      |
| TOB                                         | 6      | 26    | 25                  | 9                                      | 7       |
| TIG                                         | 19     | 25    | 27                  | 29                                     | 27      |
| FOS                                         | 8      | 6     | 6                   | 6                                      | 6       |
| COL                                         | 19     | 19    | 20                  | 20                                     | 20      |
| CIP                                         | 6      | 26    | 29                  | 29                                     | 29      |
| PIP                                         | 6      | 22    | 22                  | 12                                     | 14      |
| TIC                                         | 6      | 30    | 25                  | 6                                      | 6       |
| IMP                                         | 28     | 40    | 40                  | 40                                     | 40      |
| TZP                                         | 14     | 29    | 25                  | 25                                     | 25      |
| TIM                                         | 15     | 29    | 28                  | 23                                     | 25      |
| MEM                                         | 20     | 33    | 27                  | 23                                     | 24      |
| CAZ                                         | 6      | 23    | 22                  | 6                                      | 6       |
| FEP                                         | 6      | 26    | 25                  | 6                                      | 6       |
| ATM                                         | 6      | 16    | 10                  | 6                                      | 6       |
| RIF                                         | 13     | 17    | 6                   | 6                                      | 6       |

| Minimum inhibitory concentration (E-test) |    |        |                                |                                                |                                                |
|-------------------------------------------|----|--------|--------------------------------|------------------------------------------------|------------------------------------------------|
| Antibiotic                                | M2 | AYE WT | AYE $\Delta$ AbaR <sup>c</sup> | M2 Rif <sup>R</sup> <i>comM::AbaR1</i> Clone 1 | M2 Rif <sup>R</sup> <i>comM::AbaR1</i> Clone 2 |
| TET                                       | 4  | 128    | 8                              | 48                                             | 48                                             |

**Table S2: Antimicrobial susceptibility profiles of mixed culture transformants**

<sup>a</sup> E-test strips (bioMérieux, France) were used to compare resistance to imipenem or tetracycline.

<sup>b</sup> Amikacin (AMK), gentamicin (GEN), tobramycin (TOB), tigecycline (TIG), Fosfomycin (FOS), colistin (COL), ciprofloxacin (CIP), piperacillin (PIP), piperacillin-tazobactam (TZP), ticarcillin (TIC), ticarcillin-clavulanic acid (TIM), ceftazidime (CAZ), cefepime (FEP), meropenem (MEM), aztreonam (ATM), rifampin (RIF) and imipenem (IMP). Susceptibilities were evaluated as by disc diffusion on Muller-Hinton agar (Biorad, France) as in (1)

<sup>c</sup> AYE  $\Delta$ AbaR correspond to AbaR-cured AYE derivative (1). The strain *Pseudomonas aeruginosa* CIP 7110 was used as control for all the antibiotic susceptibility testing.

- (1) Godeux A-S, Svedholm E, Lupo A, Haenni M, Venner S, Laaberki M-H, Charpentier X. 2020. Scarless Removal of Large Resistance Island AbaR Results in Antibiotic Susceptibility and Increased Natural Transformability in *Acinetobacter baumannii*. *Antimicrob Agents Chemother* 64.
