# Supplementary material for: Interbacterial Transfer of Carbapenem Resistance and Large Antibiotic Resistance Islands by Natural Transformation in Pathogenic Acinetobacter
Source: PubMed Central journal article supplement (PMC8787482; doi:10.1128/mbio.02631-21), 2022-01-25
Supplement: mbio.02631-21-st003.pdf [file mbio.02631-21-st003.pdf]

| Sample | Donor strain | Loci   | First acquired SNP <sup>a</sup> | Last acquired SNP <sup>b</sup> | Length of imported DNA (bp) <sup>c</sup> |
|--------|--------------|--------|---------------------------------|--------------------------------|------------------------------------------|
| AB25   | 40288        | Tn2006 | 91048                           | 148295                         | 57247                                    |
| AB24   | 40288        | Tn2006 | 120337                          | 151404                         | 31067                                    |
| AB23   | 40288        | Tn2006 | 109565                          | 128246                         | 18681                                    |
| AB22   | 40288        | Tn2006 | 120849                          | 133850                         | 13001                                    |
| AB21   | 40288        | Tn2006 | 101695                          | 157494                         | 55799                                    |
| AB20   | 40288        | Tn2006 | 71139                           | 148223                         | 77084                                    |
| AB19   | 40288        | Tn2006 | 120442                          | 139003                         | 18561                                    |
| AB26   | 40288        | AbaR4  | 3815631                         | 3901652                        | 86021                                    |
| AB18   | 40288        | AbaR4  | 3813832                         | 3858827                        | 44995                                    |
| AB17   | 40288        | AbaR4  | 3766851                         | 3854677                        | 87826                                    |
| AB16   | 40288        | AbaR4  | 3785214                         | 3854677                        | 69463                                    |
| AB15   | 40288        | AbaR4  | 3814000                         | 3853045                        | 39045                                    |
| AB14   | 40288        | AbaR4  | 3802492                         | 3857180                        | 54688                                    |
| AB13   | 40288        | AbaR4  | 3813642                         | 3840698                        | 27056                                    |
| AB12   | 40288        | AbaR4  | 3770779                         | 3860715                        | 89936                                    |
| AB29   | AYE          | AbaR1  | 3585163                         | 3701113                        | 115950                                   |
| AB28   | AYE          | AbaR1  | 3592041                         | 3704339                        | 112298                                   |
| AB27   | AYE          | AbaR1  | 3587780                         | 3711356                        | 123576                                   |

**Table S3. Estimated length of the imported DNA molecules leading to the detected recombination tracts.**

SNPs acquired by the M2 recipient strain were mapped onto the donor genome and position of the first<sup>a</sup> and last<sup>b</sup> acquired provide an estimate of the length of the imported DNA molecule<sup>c</sup> that resulted in the observed recombination tracts.
